# Supplementary material
Source: PubMed Central journal article supplement (PMC5373038)
Supplement: supp_pp.16.01767_PP2016-00758DR1_Supplemental_Figure_1.pdf [file supp_pp.16.01767_PP2016-00758DR1_Supplemental_Figure_1.pdf]

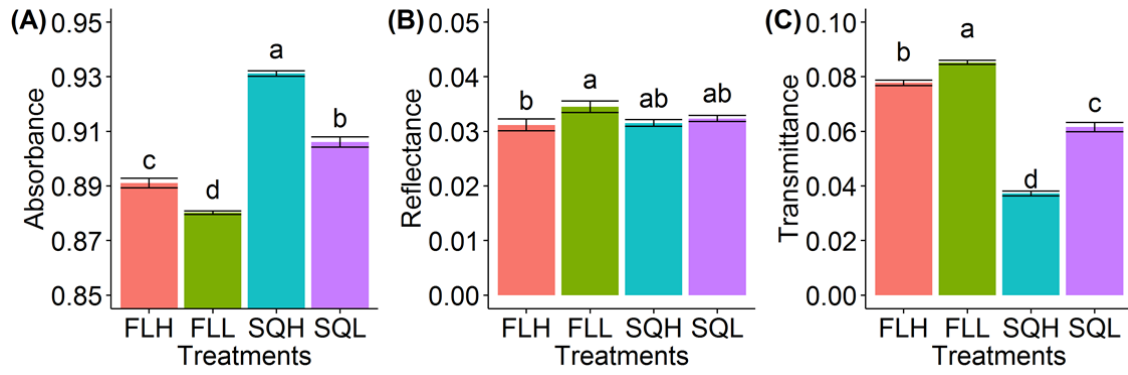

1

2 **Supplemental Figure 1.** Optical properties including absorbance (A); transmittance (B) and  
 3 reflectance (C) of leaves grown under the four different light regimes square wave high light (SQH);  
 4 fluctuating high light (FLH); square wave low light (SQL) and fluctuating low light (FLL). Error bars  
 5 represent mean  $\pm$  SE. n = 10. Letters represent the results of Tukey's post-hoc comparisons of group  
 6 means.

7

8
