# Supplementary material
Source: PubMed Central journal article supplement (PMC5373038)
Supplement: supp_pp.16.01767_PP2016-00758DR1_Supplemental_Figure_2.pdf [file supp_pp.16.01767_PP2016-00758DR1_Supplemental_Figure_2.pdf]

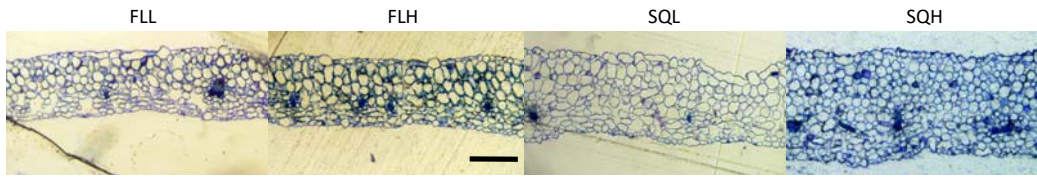

1  
2  
3  
4  
5  
6  
7

**Supplemental Figure 2.** Cross section of leaves grown under the four light treatments square wave high light (*SQH*); fluctuating high light (*FLH*); square wave low light (*SQL*) and fluctuating low light (*FLL*). Leaves collected after 28 days growth under the light regime. Bar indicates 200  $\mu\text{m}$ .
