# Supplementary material
Source: PubMed Central journal article supplement (PMC5373038)
Supplement: supp_pp.16.01767_PP2016-00758DR1_Supplemental_Figure_3.pdf [file supp_pp.16.01767_PP2016-00758DR1_Supplemental_Figure_3.pdf]

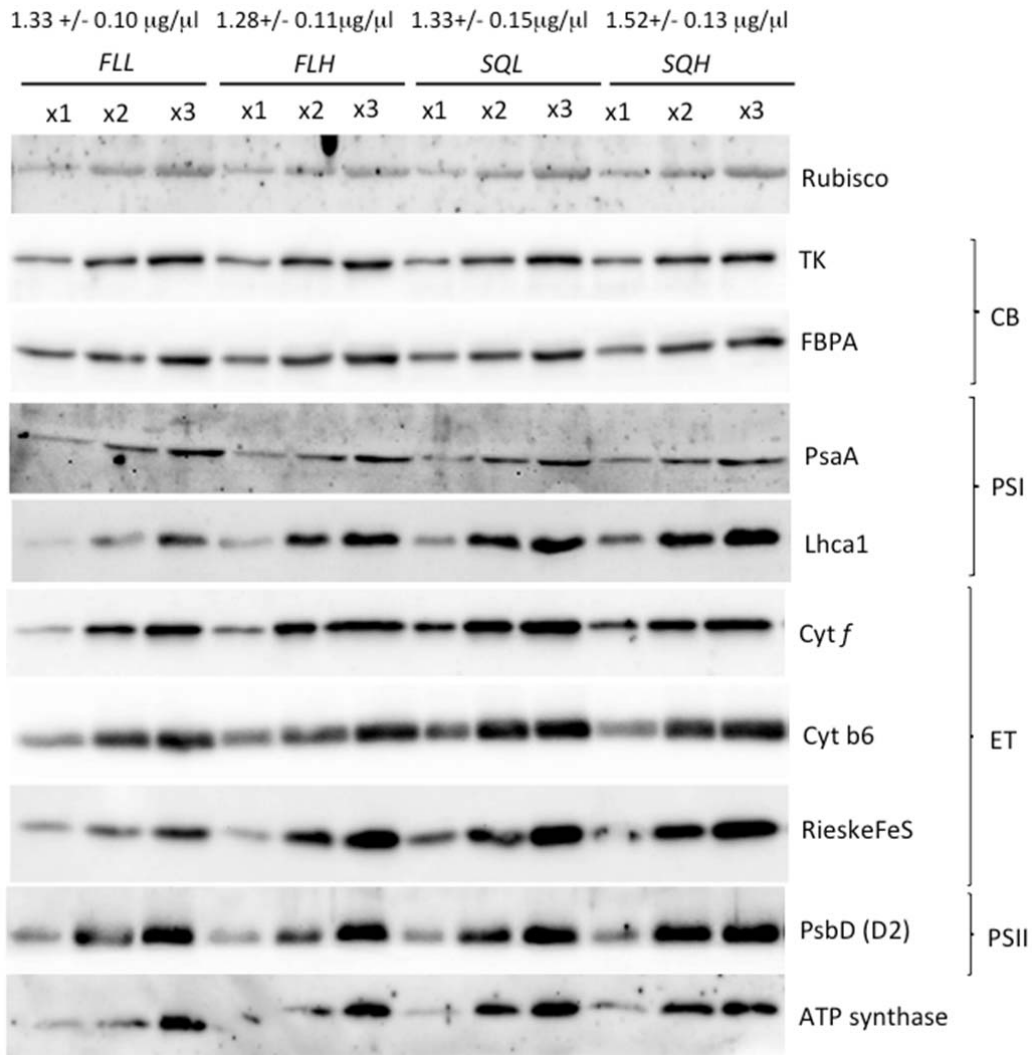

1  
 2  
 3 **Supplemental Figure S3.** Immunoblot analysis of leaves grown under the four light  
 4 treatments square wave high light (SQH); fluctuating high light (FLH); square wave low light  
 5 (SQL) and fluctuating low light (FLL). Rubisco, the Calvin-Benson cycle proteins Transketolase  
 6 (TK), FBP aldolase (FBPA) were probed along with the electron transport cytochrome b6f  
 7 complex proteins cyt *f*, cyt b6, and Rieske FeS, the photosystem I Lhca1 and PsaA proteins,  
 8 the Photosystem II PsbD/D2 proteins and ATP synthase. Numbers above blots represent  
 9 total carbon protein content ( $\mu\text{g}/\mu\text{l}$ ).
