# Supplementary material
Source: PubMed Central journal article supplement (PMC5373038)
Supplement: supp_pp.16.01767_PP2016-00758DR1_Supplemental_Figure_4.pdf [file supp_pp.16.01767_PP2016-00758DR1_Supplemental_Figure_4.pdf]

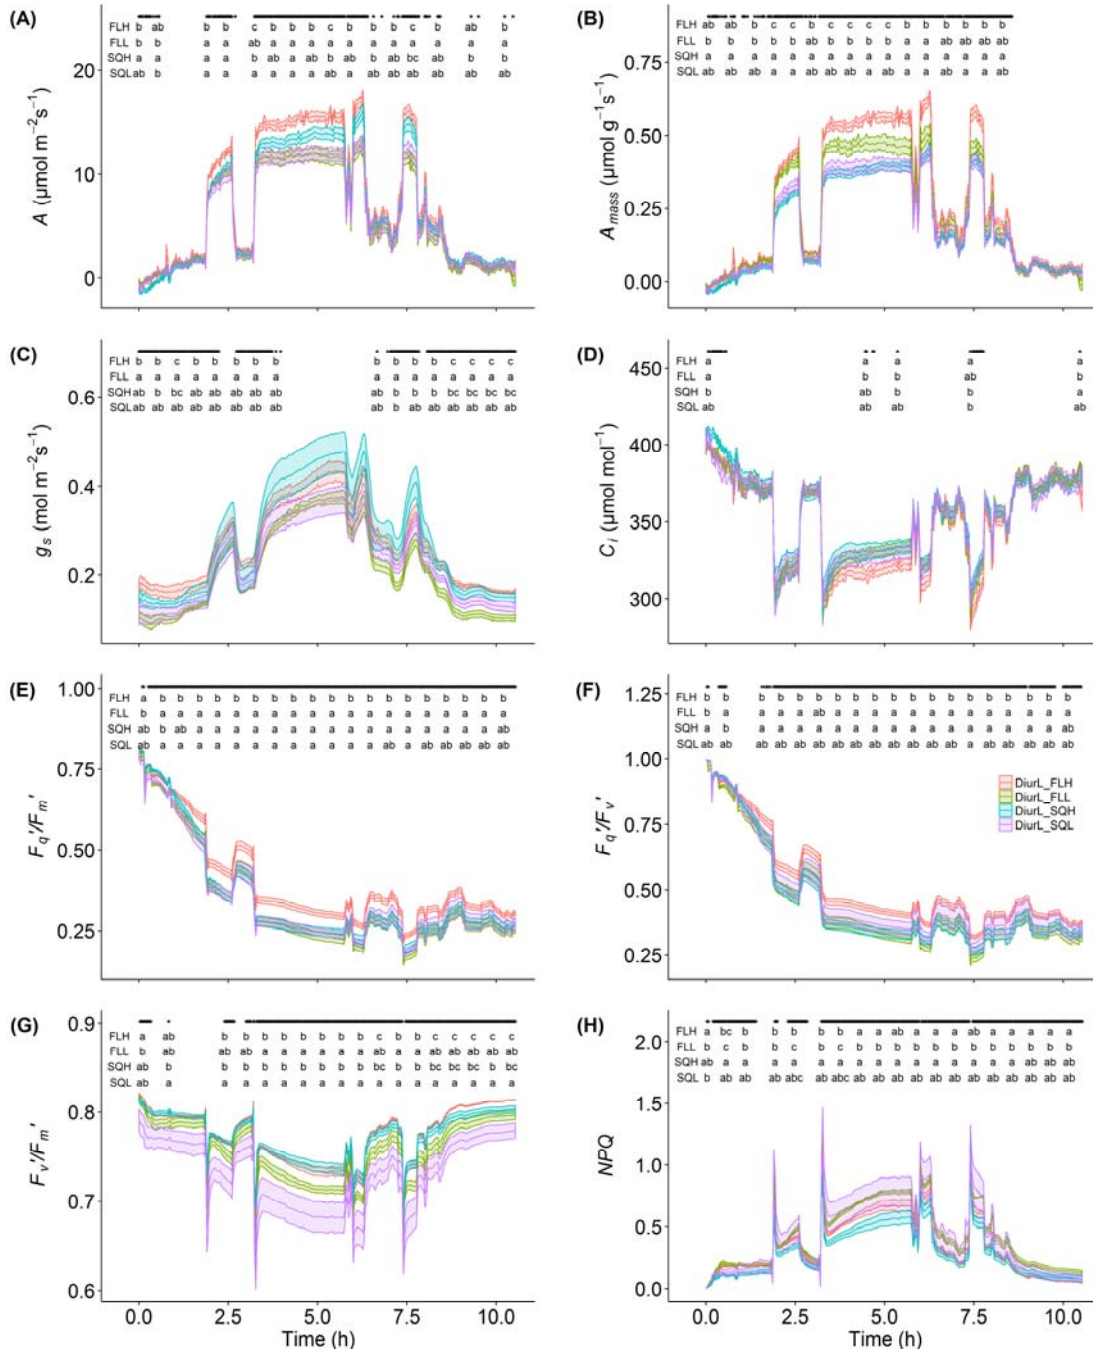

1  
2  
3  
4  
5  
6  
7  
8  
9  
10  
11  
12

**Supplemental Figure S4.** Diurnal measurements of gas exchange of net CO<sub>2</sub> assimilation on an area basis ( $A$ ; A); net CO<sub>2</sub> assimilation on a leaf mass basis ( $A_{mass}$ ; B); stomatal conductance ( $g_s$ , C); internal CO<sub>2</sub> concentration ( $C_i$ , D); and chlorophyll fluorescence parameters  $F_q'/F_m'$  (E);  $F_q'/F_v'$  (F);  $F_v'/F_m'$  (G) and  $NPQ$  (H) estimated under fluctuating low light ( $DF_{low}$ ) in all four light regimes, square wave high light (SQH); fluctuating high light (FLH); square wave low light (SQL) and fluctuating low light (FLL). Error bars represent mean  $\pm$  SE. Stars above the curves denote a significant difference between the light regimes using a one-way ANOVA with unequal variance.  $n = 5$ . Letters represent the results of Tukey's *post-hoc* comparisons of group means.
