# Supplementary material
Source: PubMed Central journal article supplement (PMC5373038)
Supplement: supp_pp.16.01767_PP2016-00758DR1_Supplemental_Table_1.pdf [file supp_pp.16.01767_PP2016-00758DR1_Supplemental_Table_1.pdf]

- 1 **Supplementary Table 1.** Cell size (width, length) and shape (length/width) from leaf tissues of plants  
 2 grown under different light treatments.

| <b>Tissue</b>   | <b>Treatment</b> | <b>Width (mm)</b> | <b>Length (mm)</b> | <b>L/W</b>  |
|-----------------|------------------|-------------------|--------------------|-------------|
| <b>EpiBot</b>   | FLH              | 0.024±0.004       | 0.018±0.002        | 0.828±0.061 |
|                 | FLL              | 0.026±0.005       | 0.016±0.002        | 0.691±0.059 |
|                 | SQH              | 0.031±0.006       | 0.021±0.002        | 0.918±0.22  |
|                 | SQL              | 0.031±0.003       | 0.02±0.002         | 0.696±0.074 |
| <b>EpiTop</b>   | FLH              | 0.048±0.009       | 0.024±0.003        | 0.607±0.114 |
|                 | FLL              | 0.049±0.01        | 0.026±0.003        | 0.661±0.092 |
|                 | SQH              | 0.04±0.005        | 0.032±0.002        | 0.934±0.149 |
|                 | SQL              | 0.045±0.009       | 0.027±0.003        | 0.712±0.077 |
| <b>Palisade</b> | FLH              | 0.04±0.002        | 0.053±0.004        | 1.353±0.115 |
|                 | FLL              | 0.034±0.003       | 0.048±0.003        | 1.453±0.131 |
|                 | SQH              | 0.039±0.003       | 0.045±0.003        | 1.155±0.041 |
|                 | SQL              | 0.043±0.003       | 0.048±0.003        | 1.137±0.066 |
| <b>Spongy</b>   | FLH              | 0.037±0.005       | 0.025±0.002        | 0.739±0.069 |
|                 | FLL              | 0.036±0.004       | 0.023±0.002        | 0.685±0.068 |
|                 | SQH              | 0.048±0.003       | 0.033±0.002        | 0.728±0.068 |
|                 | SQL              | 0.039±0.004       | 0.027±0.003        | 0.741±0.081 |

3

4
