# Supplementary material
Source: PubMed Central journal article supplement (PMC5373038)
Supplement: supp_pp.16.01767_PP2016-00758DR1_Supplemental_Table_2.pdf [file supp_pp.16.01767_PP2016-00758DR1_Supplemental_Table_2.pdf]

1 **Supplementary Table 2.** Chlorophyll a/b ratio (Chl a/b) and total carotenoid:total chlorophyll  
2 ratio (Car/Chl) of plants grown under the four light treatments. n = 8. Letters represent the  
3 results of *Tukey's post-hoc* comparisons of group means.

| <b>Treatment</b> | <b>Chl a/b</b>          | <b>Car/Chl</b>         |
|------------------|-------------------------|------------------------|
| FLH              | 3.86±0.16 <sup>ab</sup> | 0.36±0.01 <sup>a</sup> |
| FLL              | 3.69±0.12 <sup>a</sup>  | 0.32±0.02 <sup>a</sup> |
| SQH              | 4.32±0.18 <sup>ab</sup> | 0.44±0.02 <sup>b</sup> |
| SQL              | 4.22±0.13 <sup>b</sup>  | 0.31±0.02 <sup>a</sup> |

4
