# Supplementary material
Source: PubMed Central journal article supplement (PMC5373038)
Supplement: supp_pp.16.01767_PP2016-00758DR1_Supplemental_Table_3.pdf [file supp_pp.16.01767_PP2016-00758DR1_Supplemental_Table_3.pdf]

1 **Supplemental Table 3.** Parameters ( $\pm$ SE) describing the increase in area of the rosette as a  
2 function of time (days after germination) using a sigmoidal model:  $a/(1 + e^{-b * (Day-c)})$ .

| <b>Treatment</b> | <b>a</b>          | <b>b</b>          | <b>c</b>         |
|------------------|-------------------|-------------------|------------------|
| FLH              | 134.63 $\pm$ 14.2 | 0.236 $\pm$ 0.023 | 29.72 $\pm$ 1.04 |
| FLL              | 132.42 $\pm$ 8.8  | 0.210 $\pm$ 0.014 | 31.05 $\pm$ 0.77 |
| SQH              | 94.03 $\pm$ 4.9   | 0.196 $\pm$ 0.009 | 22.83 $\pm$ 0.63 |
| SQL              | 119.14 $\pm$ 8.9  | 0.169 $\pm$ 0.008 | 26.94 $\pm$ 0.97 |

3
